# Supplementary material
Source: publisher figshare collection journal article supplement (https://frontiersin.figshare.com/ndownloader/files/20022212)
Supplement: Supplementary file [file 20022212]

**A.**

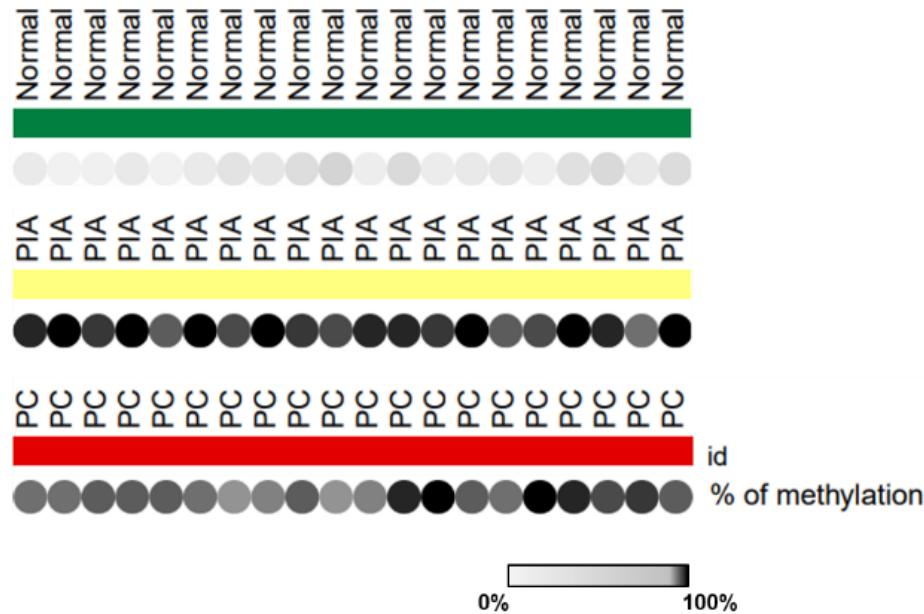

**B.**

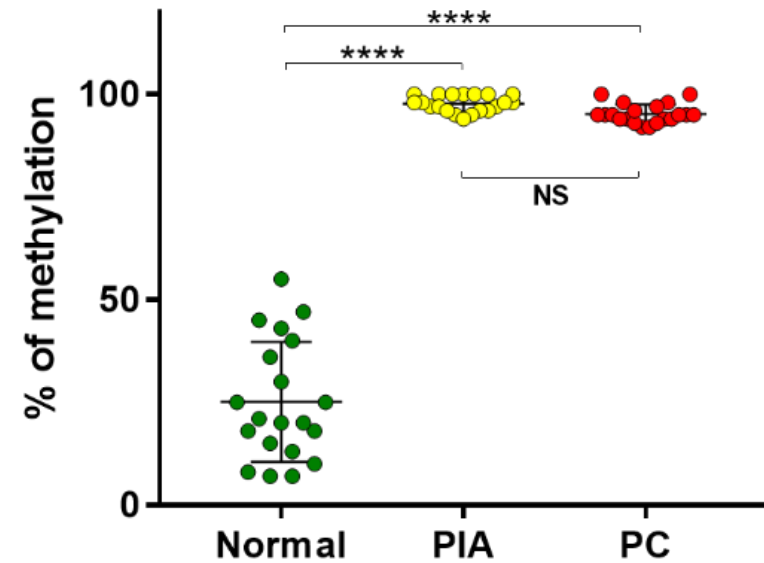

**Supplementary Figure 4.** Graphics show the methylation levels of CDH1 in Normal, PIA and PC tissues. A. Greyscale heatmap showing a minimum (0 - white) and maximum (100 - black) methylation levels per sample. B. Boxplot representation of the methylation level in Normal, PIA and PC tissues (t-test: \*\*\*\* $P < 0.001$ ). Methylation levels are represented by the average of 5 CpGs evaluated in the promoter region of the CDH1 gene. Heatmaps were constructed using Morpheus (<https://software.broadinstitute.org/morpheus>).
